# Evaluation of smartphone-based cough data in amyotrophic lateral sclerosis as a potential predictor of functional disability

Pedro Santos-Rocha<sup>1,2\*</sup>, Nuno Bento<sup>3</sup>, Duarte Folgado<sup>3,4</sup>, André Valério Carreiro<sup>3</sup>, Miguel Oliveira Santos<sup>1,4</sup>, Mamede de Carvalho<sup>1,2,4</sup>, Bruno Miranda<sup>1,2</sup>.

1. Institute of Physiology, Lisbon School of Medicine , University of Lisbon, Lisbon, Portugal;

2. Mamede de Carvalho Lab, Institute of Molecular Medicine - João Lobo Antunes, University of Lisbon, Portugal;

2. Fraunhofer Portugal AICOS, Lisbon, Portugal;

3. LiBPhys (Laboratory for Instrumentation Biomedical Engineering and Radiation Physics), NOVA School of Science and Technology, Lisbon, Portugal;

4. Department of Neurosciences and Mental Health, Hospital de Santa Maria -CHULN, Lisbon, Portugal.

\*Correspondence: [pedro.rocha@medicina.ulisboa.pt](mailto:pedro.rocha@medicina.ulisboa.pt); Tel.: 913428353

\*Current address: Department of Physiology, Institute of Molecular Medicine, Av. Prof. Egas Moniz, 1649-028, Lisbon, Portugal.

# 1 Abstract

2  
3 Objectives: Cough dysfunction is a feature of patients with amyotrophic lateral sclerosis (ALS). The  
4 cough sounds carry information about the respiratory system and bulbar involvement. Our goal was to  
5 explore the association between cough sound characteristics and the respiratory and bulbar functions  
6 in ALS.

7 Methods: This was a single-center, cross-sectional, and case-control study. On-demand coughs from  
8 ALS patients and healthy controls were collected with a smartphone. A total of 31 sound features were  
9 extracted for each cough recording using time-frequency signal processing analysis. Logistic regression  
10 was applied to test the differences between patients and controls, and in patients with bulbar and  
11 respiratory impairment. Support vector machines (SVM) were employed to estimate the accuracy of  
12 classifying between patients and controls and between patients with bulbar and respiratory  
13 impairment. Multiple linear regressions were applied to examine correlations between cough sound  
14 features and clinical variables.

15 Results: Sixty ALS patients (28 with bulbar dysfunction, and 25 with respiratory dysfunction) and forty  
16 age- and gender-matched controls were recruited. Our results revealed clear differences between  
17 patients and controls, particularly within the frequency-related group of features (AUC 0.85, CI 0.79-  
18 0.91). Similar results were observed when comparing patients with and without bulbar dysfunction;  
19 and with and without respiratory dysfunction. Sound features related to intensity displayed the  
20 strongest correlation with disease severity.

21 Discussion: We found a good relationship between specific cough sound features and clinical variables  
22 related to ALS functional disability. The findings relate well with some expected impact from ALS on  
23 both respiratory and bulbar contributions to the physiology of cough. Finally, our approach could be  
24 relevant for clinical practice, and it also facilitates home-based data collection.

25  
26  
27  
28  
29

# 1. Introduction

2

3 Amyotrophic Lateral Sclerosis (ALS) is a progressive neurodegenerative disease  
4 characterized by the loss of both upper and lower motor neurons (1). The consequent motor  
5 dysfunction leads to symptoms affecting limbs, bulbar and respiratory muscles – and eventual  
6 death by respiratory insufficiency or infection (2). In general, the disease is characterized by  
7 significant variability in onset region, as well as in the pattern and rate of progression (3–7).

8 The majority of cases show either a spinal phenotype or a bulbar variant, but some  
9 patients present initial trunk or respiratory involvement (5,8,9). However, an early respiratory  
10 and bulbar impairment are associated with poor quality of life, malnutrition, and early mortality  
11 (10,11). Non-invasive pulmonary function tests, in particular forced vital capacity (FVC), has long  
12 been used for respiratory assessment and monitoring. However, they require cooperative  
13 patients, good lips strength, and repeated testing to ensure consistency of measurements (12). On  
14 the other hand, an established and comprehensive clinical scale to objectively monitor bulbar  
15 disease and respiratory progression in ALS has yet to be achieved (13).

16 During the last few years, objective evaluation of cough sounds, in particular evaluating  
17 its quantitative characteristics in terms of sound frequency or intensity, has gained popularity for  
18 detecting and distinguishing different respiratory dysfunctions (12,14–18). The increasing  
19 evidence concerning the objective evaluation of cough is also grounded by the physiological  
20 mechanisms of coughing which require considerable coordination and timing of breathing, thus  
21 being sensitive to abnormalities in the respiratory system (19,20). Physiologically, cough involves  
22 a deep inspiration, followed by vigorous contraction of the expiratory muscles (in particular the  
23 abdominal muscles) against a closed glottis. When a certain subglottic pressure is reached, the  
24 glottis opens, producing one initial supramaximal expiratory airflow followed by a longer-lasting  
25 lower expiratory flow, generating the cough sound at the same time. Importantly, such  
26 physiological mechanisms for a normal cough also rely on a normal bulbar function, being

27 especially relevant for the glottis and intrinsic laryngeal muscles' performance. The latter muscles  
28 are the ones responsible for the dimensions of the glottis rhyme (i.e., the tension regulation of the  
29 vocal ligaments) and changes in laryngeal opening and closing – which are key properties of the  
30 cough sound. In more advanced ALS, cough is generally weak and absent (21,22); this causes  
31 inability to clear secretions, eases choking and impairs protection of the respiratory system –  
32 often leading to aspiration pneumonia. Recent progress has been made to take advantage of  
33 sensors to monitor the functional state of ALS patients, including for home-based assessments  
34 (23–26). Stegmann et al. (27) used a mobile application (app) installed on the patient's mobile  
35 device to record speech acoustics and to predict their forced vital capacity (FVC). Furthermore,  
36 Vashkevich et al. (28) proposed an approach to voice assessment for automatic systems to  
37 differentiate healthy individuals from ALS patients (based on sustained phonation of the vowels  
38 /a/ and /i/). They used a wide range of acoustic features to achieve high accuracy in this  
39 classification. A feasibility study utilizing cough sound to differentiate between healthy  
40 individuals and those with ALS was recently conducted by Cebola et al. (29). The study endorsed  
41 the viability of using coughs for remote monitoring; however, the sample size was limited and not  
42 gender-matched. Despite previous efforts focused on studying speech and cough acoustics, very  
43 few studies have comprehensively explored the potential of cough sound analysis in ALS.

44 In this study, we hypothesize that cough sound features obtained by a smartphone and  
45 using time- and frequency-domain analysis, could inform about bulbar and respiratory  
46 impairments in ALS patients. Thus, the present work aims to: 1) evaluate if the sound features of  
47 a voluntary cough in ALS patients are different from age- and gender-matched healthy controls;  
48 2) correlate cough sound features with functional status, respiratory and bulbar impairment in  
49 ALS patients; and 3) test the hypothesis that frequency sound features have a stronger association  
50 with bulbar dysfunction, while intensity sound features are more closely related to respiratory  
51 dysfunction. Furthermore, we aimed to evaluate the usefulness of machine learning for  
52 conducting future home-based assessments, by recording audio samples with a commonly  
53 available device, in an ecological setting.

## 54 **2. Materials and Methods**

### 55 **2.1 Study design and participants**

56 This was a single-center, cross-sectional, case-control study that was part of a broader ALS  
57 project (HomeSenseALS - PTDC/MEC-NEU/6855/2020). We included consecutive ALS patients  
58 according to Gold Coast criteria (30). All patients were followed at our ALS clinic in Lisbon, and  
59 had full neurological, neurophysiological, neuroimaging and blood tests to rule out mimicking  
60 conditions (31). Patients with a previous history of lung disorders, with resting dyspnea, severe  
61 cognitive involvement impairing the understanding of the voluntary coughing task, and those  
62 declining to participate were excluded. In the control group we included healthy age- and gender-  
63 matched controls (in general spouses of the ALS patients and people working in the institution).  
64 The recruitment started on April 4, 2022, and was concluded on August 31, 2023. The study was  
65 approved by the local research ethics committee of the Centro Académico de Medicina de Lisboa  
66 (CAML-Ref. 146/21). All participants gave written informed consent, which was in accordance  
67 with the declaration of Helsinki.

68

### 69 **2.2 Clinical evaluation**

70 For ALS patients, we collected demographic data including age, sex, body mass index  
71 (BMI), smoking habits, disease duration, and the region of disease onset. To evaluate the  
72 functional disability, we used the revised functional ALS rating scale (ALSFRS-R) (32).

73 Respiratory symptoms were determined based on the ALSFRS-R respiratory subscore  
74 (which consists of questions 10 through 12 pertaining to dyspnea, orthopnea, and respiratory  
75 insufficiency); patients with a score less than 12 were considered to have respiratory dysfunction.  
76 Sitting predicted FVC (FVC%) was measured using a computer-based USB spirometer  
77 (microQuark®, Cosmed®), the best of three reliable maneuvers was used for statistics (11). In  
78 addition to FVC%, the following respiratory measures were also included: maximum expiratory  
79 and inspiratory pressures (MIP% and MEP%, respectively) and cough peak flow (CPF). Similarly,

80 bulbar symptoms were evaluated using the ALSFRS-R bulbar subscore (which consists of  
81 questions 1 through 3 about speech, salivation, and swallowing). Patients with a score less than  
82 12 were considered having bulbar dysfunction. This data was accessed retrospectively, between  
83 August 31, 2023, and October 31, 2023. The authors had no access to information that could  
84 identify individual participants during or after data collection.

85

### 86 **2.3 Cough sound: recording, signal processing and feature extraction**

87 All subjects were instructed to perform, while seated in a quiet room, three voluntary  
88 coughs (to ensure a repeatable sound relationship). The sound recordings were done using a  
89 smartphone, placed approximately 20-25 cm away from the mouth and at an angle of  
90 approximately 45° (as described in (12)). These procedures aimed to remove effects of wind noise  
91 produced when one rapid expulsion of air directly hits the microphone. For patients, the cough  
92 sounds were recorded during a routine patient's clinical visit, after ensuring that the patient was  
93 resting for a period longer than 10 minutes, and comfortable without dyspnea.

94 After the cough data collection, the raw signal was processed with Librosa – a Python  
95 package for audio signal analysis (33). The analysis was conducted using a frame length of 2048  
96 samples per frame and a hop length of 512. In order to minimize potential biases stemming from  
97 the beginning and end of the recordings (and to ensure that the analysis was focused solely on the  
98 cough time frames) the split function of Librosa was employed with a cutoff of 20 decibels  
99 eliminating the initial and final periods of silence in the cough recordings.

100 Once the pre-processing was completed, the generated cough sound signals were analyzed  
101 to extract audio-based features. For this, we used the *Time Series Feature Extraction Library*  
102 (TSFEL) that automatically extracts over 60 different features on the statistical, temporal, and  
103 spectral domains (34).

104 In light of prior research findings (12,29,35,36) and relevance in general sound analysis,  
105 we pre-selected 11 features based on the time domain and 20 features based on the frequency  
106 domain (see details in **Table 1**). To enhance the interpretation of the results, we subsequently

107 categorized these features into three distinct groups, each pertaining to specific underlying  
 108 information (with potential relevance for the various physiological steps of coughing): 1) a group  
 109 encompassing sound frequency-related features – the frequency group; 2) another group  
 110 comprising sound intensity-related features – the intensity group; and 3) a final group that  
 111 combines features of both frequency and intensity domains – the mixed group. All extracted  
 112 features were normalized to their maximum value (with a range between -1 and 1) (**Fig 1**).

113

114 **Figure 1. The workflow of feature categorization according to frequency, intensity, and mixed**  
 115 **groups.**

116

117 **Table 1.** List of cough sound features subjected to analysis.

|                                                                                          |
|------------------------------------------------------------------------------------------|
| <b><i>Frequency group</i></b>                                                            |
| Maximum frequency of the signal                                                          |
| Fundamental frequency                                                                    |
| Zero-crossing rate of the signal                                                         |
| Number of positive turning points of the signal                                          |
| Spread of the spectrum around its mean value                                             |
| Power spectrum density bandwidth of the signal                                           |
| Spectral kurtosis: flatness of a distribution around its mean value                      |
| Spectral skewness: asymmetry of the distribution around its mean value                   |
| Spectral centroid: barycenter of the spectrum                                            |
| Spectral roll-off of the signal                                                          |
| Number of positive turning points of the fft magnitude signal                            |
| <b><i>Intensity group</i></b>                                                            |
| Maximum value of the signal                                                              |
| Mean value of the signal                                                                 |
| Median value of the signal                                                               |
| Minimum value of the signal                                                              |
| Standard deviation (std) of the signal                                                   |
| Variance of the signal                                                                   |
| Kurtosis: where $\mu$ and $\sigma$ are the mean and the standard deviation of the signal |
| Skewness: where $\mu$ and $\sigma$ are the mean and the standard deviation of the signal |
| Centroid along the time axis                                                             |
| Peak to peak distance                                                                    |
| <b><i>Mixed group</i></b>                                                                |

|                                                                 |
|-----------------------------------------------------------------|
| Absolute energy of the signal                                   |
| Area under the curve of the signal computed with trapezoid rule |
| Total energy of the signal                                      |
| Root mean square of the signal (Rms)                            |
| Maximum power spectrum density of the signal                    |
| Spectral entropy of the signal based on Fourier transform       |
| Entropy of the signal using Shannon Entropy                     |
| Slope of the signal                                             |
| Spectral slope                                                  |
| Duration of the signal                                          |

118

119

## 120 **2.4 Machine-learning analysis**

121 After the feature extraction step, a dataset was built for the purpose of a binary  
122 classification task with the objective of distinguishing between ALS patients and control subjects,  
123 patients with and without bulbar dysfunction, and patients with and without respiratory  
124 dysfunction. The dataset was partitioned, with 75% of the data allocated to the training set and  
125 the remaining data designated for testing. The process of shuffling resulted in a well-balanced test  
126 set in terms of class, age, gender, and dataset distribution. To identify a small subset of relevant  
127 features for the objective analysis of bulbar and respiratory ALS dysfunction, the extracted cough  
128 sound features underwent feature selection using the sequential feature selection (SFS) algorithm  
129 based on a logistic regression (LR) classifier. Through SFS, we selected the cough sound features  
130 that were strongly correlated with the class, thus removing the less relevant features from the  
131 original dataset. Subsequently, the main classification task was performed by training a support  
132 vector machine (SVM) classifier based on the linear kernel. In this process, only the most relevant  
133 features, which were selected in the preceding step were considered, in an attempt to reduce the  
134 potential for overfitting. For model evaluation, ROC-AUC (area under the curve) scores were  
135 calculated over five iterations, each with a distinct random seed, so that it would be possible to  
136 estimate the 95% confidence interval. This comprehensive procedure facilitated the assessment  
137 of model stability and reliability.



138

## 139 **2.5 Statistical analysis**

140 Data analysis was performed using Python version 3.11.2 (Python Software Foundation).

141 For the significance level,  $\alpha=0.05$  was considered. Descriptive statistics consisted of frequencies  
142 (with proportions) for categorical variables and mean values (with standard deviation) for  
143 continuous variables. To compare mean values, parametric tests such as the two-sample t-test or  
144 the one-way ANOVA were applied. If the normality assumption of the continuous variable was  
145 violated (significant Kolmogorov-Smirnov test with an absolute skewness  $> 2$ ), non-parametric  
146 tests such as Mann-Whitney U-test or Kruskal-Wallis test were considered and results reported,  
147 if different from parametric analysis.

148 ROC analyses were performed to identify the ROC-AUC of the SVM, for discriminating  
149 between:

150

151 (1) controls vs. ALS – with the frequency group of features;

152 (2) controls vs. ALS – with the intensity group of features;

153 (3) controls vs. ALS – with the mixed group of features.

154

155 Similar analyses were carried out for the comparison between patients with bulbar  
156 dysfunction vs. those without; and for patients with respiratory dysfunction vs. those without. Age  
157 and gender were added into each set of features, enabling the SVM model to consider these  
158 important demographic factors.

159 Finally, we examined how each of the selected features related to the disability score and  
160 pulmonary function tests in ALS patients. For the former, multiple linear regression models were  
161 used, having the ALSFRS-R total score as dependent variable and age and gender as confounding  
162 variables. On the other hand, simple linear correlations were used to elucidate associations  
163 between sound features and pulmonary function measurements, including FVC%, MEP%, MIP%  
164 and CPF.

## 165 3. Results

### 166 3.1 Demographics and clinical characteristics

167 We analyzed 300 cough sounds recordings from a total of 100 subjects (60 ALS patients  
168 and 40 controls - 3 cough sounds each). The demographic and clinical characteristics of  
169 participants are shown in **Table 2**. Groups had no significant differences in terms of age ( $p= 0.79$ )  
170 or sex distribution ( $p= 0.21$ ). There were no statistically significant differences between patients  
171 with vs without respiratory dysfunction, as well as between patients with vs without bulbar  
172 dysfunction, in terms of age, BMI, disease duration and percentage of smokers (all t-tests with p-  
173 values  $> 0.05$ ). However, the frequency of females was higher in the group with bulbar dysfunction  
174 (71% vs 34%,  $p< 0.001$ ) and in the group of patients with respiratory dysfunction (72% vs 43%,  
175  $p< 0.05$ ).

176

177 **Table 2.** Baseline characteristics of whole ALS patients population ( $n=60$ ), and controls ( $N=40$ ).  
178

| CLINICAL CHARACTERISTICS                            | ALS PATIENTS<br>N=60 | CONTROLS<br>N=40 |
|-----------------------------------------------------|----------------------|------------------|
| AGE (mean±SD)                                       | 61.87 ± 11.4         | 62.58 ± 15.63    |
| <b>GENDER</b>                                       |                      |                  |
| MEN                                                 | 27 (45%)             | 13 (32.5%)       |
| WOMAN                                               | 33 (55%)             | 27 (64.5%)       |
| BMI (KG/M <sup>2</sup> ) (mean±SD)                  | 26.3 ± 4.1           |                  |
| <b>SYMPTOM DURATION (MONTHS)</b>                    |                      |                  |
| MEDIAN                                              | 25                   |                  |
| 1 <sup>ST</sup> -3 <sup>RD</sup> INTERQUATILE RANGE | 6 – 141              |                  |
| <b>DISEASE ONSET</b>                                |                      |                  |
| BULBAR ONSET                                        | 15 (25%)             |                  |
| UPPER LIMB ONSET                                    | 17 (28.3%)           |                  |
| LOWER LIMB ONSET                                    | 28 (46.7%)           |                  |
| ALSFRS-R TOTAL SCORE (0-48) (mean±SD)               | 34.9 (7.8)           |                  |
| BULBAR DYSFUNCTION                                  | 28 (46.7%)           |                  |
| RESPIRATORY DYSFUNCTION                             | 25 (41.7%)           |                  |

179

180 BMI, body mass index; ALSFRS-R, revised amyotrophic lateral sclerosis functional rating scale.

181

182

### 183 3.2 Cough sound features in ALS and healthy controls

184 We started by comparing the frequency group of cough sound features in ALS patients vs.  
185 controls. The SFS algorithm selected six features of the thirteen initially proposed, including  
186 fundamental frequency, number of the spectrum positive turning points, spectral bandwidth,  
187 spectral roll-off, spectral dispersion, and zero-crossing rate (ZCR). Following ROC analysis (**Fig 2**),  
188 the prediction ROC-AUC of the final model with the seven selected features was 0.85 (IC 95%:  
189 0.79-0.91).

190

191 **Figure 2. Support vector machine (SVM) analysis of all cough sound samples.** Receiver operating  
192 characteristic curves (ROC) were calculated with a SVM to differentiate ALS patients and controls for the  
193 three different groups of cough sound features. One of the five model's iterations is demonstrated (settings:  
194 k\_features = 'best'; forward = 'False'; scoring = 'accuracy'; cv = '5'; random\_state = '41').

195

196 Similar analyses were performed for the remaining intensity and mixed groups. The SFS  
197 applied to the intensity group of features resulted in the selection of four features out of the initial  
198 twelve. Specifically, these included the temporal centroid, the mean, and the kurtosis of the signal,  
199 and presumed gender. However, the model with the four intensity features exhibited a modest  
200 performance of 0.59 (IC 95%: 0.52-0.66). Also, to note that only the temporal centroid and the  
201 kurtosis of the signal demonstrated significant discriminative capability between an ALS-related  
202 cough and a control cough.

203

204 Regarding the mixed group, the model comprised the following selected features: absolute  
205 energy, spectral and time entropies, maximum power of the signal, total amount of energy, and  
206 presumed gender. However, similar to the intensity group, the overall model performance was  
207 only modest, yielding an ROC-AUC of 0.6 (IC 95%: 0.52-0.68). To also note that only the time and  
208 spectral entropies exhibited significant predictive capability for distinguishing between ALS  
patients and healthy controls. **Fig 3** shows an example where it is evident that the primary

209 distinctions between an ALS and a control cough lie within the frequency group of features. **Table**  
210 **3** shows all statistical values.

211

212 **Figure 3. An example of the analysis of sound waves in voluntary coughing of a healthy control**  
213 **(upper row) and an ALS patient (lower row).** Each column of the image depicts different features of the  
214 three distinct groups of features. The first column highlights the frequency features associated with the  
215 repetition rate of one event, such as the number of times that the signal passes the zero line or the number  
216 of positive turning points. The second column emphasizes the intensity features, such as the signal  
217 amplitude or peak distance. Lastly, the third column shows features that provide information on both  
218 frequency and intensity, such as the signal power and entropy. The main differences were observed in the  
219 frequency group. To note that these cough signals did not undergo pre-processing procedures.

220

221

222 **Table 3.** F values from regression analyses contributing of Control vs. ALS classification to performance  
223 on each voice sound variable.

| GROUP                  | FEATURES                                          | F value  | P value |
|------------------------|---------------------------------------------------|----------|---------|
| <b>Frequency group</b> | Fundamental frequency                             | 9.19**   | 0.0031  |
|                        | Number of the spectrum<br>positive turning points | 2.02     | 0.16    |
|                        | Spectral bandwidth                                | 8.60**   | 0.0042  |
|                        | Spectral roll-off                                 | 4.38*    | 0.039   |
|                        | Spectral dispersion                               | 10.23**  | 0.0019  |
|                        | ZCR                                               | 20.19*** | < 0.001 |
| <b>Intensity group</b> | Temporal centroid                                 | 11.55*** | < 0.001 |
|                        | Mean amplitude of the signal                      | 0.54     | 0.47    |
|                        | Kurtosis                                          | 9.90**   | 0.0022  |
| <b>Mixed group</b>     | Absolute energy                                   | 0.42     | 0.52    |
|                        | Entropy                                           | 7.25**   | 0.0083  |
|                        | Spectral entropy                                  | 10.71**  | 0.0015  |
|                        | Maximum power of the signal                       | 0.39     | 0.53    |
|                        | Total amount of energy                            | 1.03     | 0.31    |

224

Correlation is significant at the 0.05 level \*;

225

Correlation is significant at the 0.01 level \*\*;

226

Correlation is significant at the 0.001 level \*\*\*;

227

### 228 **3.3 Correlations with the overall functional disability**

229 Next, we started to focus more specifically on the ALS patients, and how the cough sound

230 features were related to the functional disability of the disease. We found that the intensity, as

231 well as the mixed group features, exhibited the strongest correlations with ALSFRS-R total score  
232 – indicating that patients with more severe symptoms produced cough sounds with a greater  
233 relative impact on the intensity domain (**Fig 4**). Broadly, patients in more advanced functional  
234 states produce less intense cough sounds.

235

236 **Figure 4. Analysis of sound waves in voluntary coughing: comparison between patients in different**  
237 **disease states.** The left image represents the cough sound of one patient in a better functional state (Female;  
238 60> years old; ALSFRS-R total score of 39) versus the right image, which represents the cough sound of one  
239 patient in a worse functional state (Female; 60> years old; ALSFRS-R total score of 20). The main differences  
240 are presented in the intensity-related group of features. (Signal without pre-processing)

241

242 Moderate but significant correlations have been found between the ALSFRS-R total score  
243 and various intensity features, including the maximum amplitude (beta= 0.43, p= 6.85e-4), the  
244 standard deviation of the amplitude of the signal (beta= 0.33, p= 1.55e-5) and the peak-to-peak  
245 distance (beta= 0.44, p= 4.07e-4). Moreover, we found moderate to strong negatively significant  
246 correlations, with the maximum cough sound power (beta= -0.58, p= 2.54e-10); and moderate  
247 positively significant correlations with the area under the curve of the signal and the absolute  
248 energy (beta= 0.35, p= 9.76e-6; beta= 0.34, p= 1.67e-6, respectively).

249 Despite being effective in distinguishing cough sounds from ALS and healthy controls, the  
250 frequency group of features showed weaker associations with the functional status of the disease.  
251 Our analysis revealed that ZCR (beta= 0.20, p= 3.01e-6), and the number of positive turning points  
252 (beta= 0.25, p= 1.10e-5) exhibited weak positively significant correlations with the ALSFRS-R total  
253 score. In contrast, the spectral centroid (beta= 0.38, p= 1.97e-4), and spectral bandwidth (beta=  
254 0.32, p= 8.83e-8) demonstrated stronger correlations with the functional state of the disease,  
255 making them the best-correlated features in this frequency group (see **Table 4**).

256

257 **Table 4.** Correlations between the ALSFRS-R total score and different cough sound features. Results are  
258 adjusted for age and gender.

259

| GROUP | FEATURES | METRICS |         |         |
|-------|----------|---------|---------|---------|
|       |          | $\beta$ | T VALUE | P VALUE |

|                                                               |                                   |       |      |        |
|---------------------------------------------------------------|-----------------------------------|-------|------|--------|
| <b>Intensity</b><br>0.59 (IC 95%: 0.52-0.66)<br>model ROC-AUC | Maximum amplitude                 | 0.43  | 3.59 | <0.001 |
|                                                               | Standard deviation of the signal  | 0.33  | 4.73 | <0.001 |
|                                                               | Peak distance                     | 0.44  | 3.76 | <0.001 |
| <b>Mixed</b><br>0.60 (IC 95%: 0.52-0.68)<br>model ROC-AUC     | Maximum power                     | -0.58 | 7.68 | <0.001 |
|                                                               | Area under the curve              | 0.35  | 4.86 | <0.001 |
|                                                               | Absolute energy                   | 0.34  | 5.35 | <0.001 |
| <b>Frequency</b><br>0.85 (IC 95%: 0.79-0.91)<br>model ROC-AUC | Zero-crossing rate                | 0.20  | 5.19 | <0.001 |
|                                                               | Spectral centroid                 | 0.38  | 3.98 | <0.001 |
|                                                               | Number of positive turning points | 0.25  | 4.83 | <0.001 |
|                                                               | Spectrum bandwidth                | 0.32  | 6.14 | <0.001 |

260

261

### 262 3.4 Differences between ALS patients with and without respiratory dysfunction

263 We identified both intensity and mixed groups of features as the most effective in  
 264 distinguishing patients with respiratory dysfunction from those without (with positive  
 265 associations). In terms of intensity-related features, the predictors that remained in the final  
 266 model were the maximum and standard deviation of the signal as well as peak-to-peak distance,  
 267 yielding a prediction ROC-AUC of 0.67 (IC 95%: 0.56-0.78).

268 Regarding the mixed group features, the SFS application resulted in a final model  
 269 comprising maximum power, spectral entropy, and the spectral slope. The prediction ROC-AUC of  
 270 this model was 0.65 (IC 95%: 0.55-0.75).

271 Finally, the group of frequency-related features included in the final model the spectral  
 272 bandwidth and centroid, the spectral skewness, and the ZCR; and yielding a prediction ROC-AUC  
 273 of 0.59 (IC 95%: 0.49-0.69). **Table 5** shows all statistical values.

274

275 **Table 5.** F values from regression analyses contributing of with respiratory vs. without respiratory  
276 dysfunction classification to performance on each voice sound variable.

| GROUP                  | FEATURES                                   | F value  | P value |
|------------------------|--------------------------------------------|----------|---------|
| <b>Frequency group</b> | Spectral bandwidth                         | 4.07*    | 0.048   |
|                        | Spectral centroid                          | 4.03*    | 0.049   |
|                        | Spectral skewness                          | 6.21*    | 0.016   |
|                        | ZCR                                        | 5.24*    | 0.026   |
| <b>Intensity group</b> | Maximum amplitude of the signal            | 14.49*** | <0.001  |
|                        | Standard deviation of the signal amplitude | 2.60     | 0.11    |
|                        | Peak-to-peak distance                      | 16.64*** | <0.001  |
| <b>Mixed group</b>     | Maximum power of the signal                | 4.31*    | 0.042   |
|                        | Spectral entropy                           | 9.80**   | 0.0027  |
|                        | Spectral slope                             | 7.72**   | 0.0074  |

277 Correlation is significant at the 0.05 level \*;  
278 Correlation is significant at the 0.01 level \*\*;  
279 Correlation is significant at the 0.001 level \*\*\*;  
280

### 281 3.4.1 Correlations between cough sound analysis and respiratory function assessments

282 Out of the complete cohort of 60 ALS patients, 47 had respiratory function testing at the  
283 time of cough sound data recording (< 6 weeks). In this group, mean ALSFRS-R was 38, and the  
284 average FVC%, MIP%, MEP%, and CPF were 77% (18.33 SD), 93.6% (32.8 SD), 79.8% (27 SD), and  
285 288.8 L/min (109 SD), respectively.

286 **Table 6** shows that the intensity and mixed groups of features exhibited a moderate  
287 (negative) significant correlations with FVC%. However, no significant correlations were  
288 observed for CPF, MIP%, and MEP%.

289

290 **Table 6.** Correlations between the FVC (%), MIP (%), MEP (%), and CPF (L/min), and different cough sound  
291 features.  
292

| GROUP            | FEATURES        | FVC %   |         | MIP%   |         | MEP%  |         | CPF    |         |
|------------------|-----------------|---------|---------|--------|---------|-------|---------|--------|---------|
|                  |                 | r       | P value | r      | P value | r     | P value | r      | P value |
| <b>Intensity</b> | Absolute energy | -0.50** | 0.0015  | -0.091 | 0.60    | -0.29 | 0.096   | 0.0060 | 0.97    |

|                                                                      |                                           |          |        |         |      |        |       |        |       |
|----------------------------------------------------------------------|-------------------------------------------|----------|--------|---------|------|--------|-------|--------|-------|
| 0.59 (IC 95%:<br>0.52-0.66)<br>model ROC-<br>AUC                     | AUC                                       | -0.42*** | <0.001 | -0.093  | 0.59 | -0.31  | 0.072 | 0.033  | 0.85  |
|                                                                      | Spectral<br>entropy                       | -0.17    | 0.32   | -0.10   | 0.56 | -0.30  | 0.079 | -0.044 | 0.80  |
| <b>Mixed</b><br>0.60 (IC 95%:<br>0.52-0.68)<br>model ROC-<br>AUC     | Temporal<br>centroid                      | -0.53*** | <0.001 | -0.0076 | 0.96 | -0.26  | 0.13  | -0.031 | 0.86  |
|                                                                      | Peak distance                             | -0.24    | 0.15   | 0.033   | 0.85 | -0.14  | 0.42  | 0.20   | 0.24  |
| <b>Frequency</b><br>0.85 (IC 95%:<br>0.79-0.91)<br>model ROC-<br>AUC | Spectral<br>dispersion                    | 0.31     | 0.066  | -0.066  | 0.70 | 0.11   | 0.54  | 0.20   | 0.26  |
|                                                                      | Spectral<br>positive<br>turning<br>points | -0.46**  | 0.0039 | -0.017  | 0.92 | -0.36* | 0.035 | -0.032 | 0.085 |

293 Correlation is significant at the 0.05 level \*;  
294 Correlation is significant at the 0.01 level \*\*;  
295 Correlation is significant at the 0.001 level \*\*\*;  
296

### 297 3.5 Differences between ALS patients with and without bulbar dysfunction

298 When comparing ALS patients with and without bulbar dysfunction, we observed that  
299 frequency-related features were the best group at this discrimination (**Table 7**). The frequency  
300 features that were retained in the final model included spectral bandwidth, spectral centroid,  
301 spectral roll-off, and spectral kurtosis and skewness. Despite being the most significant, the  
302 overall ROC-AUC of the model prediction was 0.53 (IC 95%: 0.44-0.61).

303

304 **Table 7.** F values from regression analyses contributing of with bulbar vs. without bulbar dysfunction  
305 classification to performance on each voice sound variable.

| GROUP                  | FEATURES                        | F value | P value |
|------------------------|---------------------------------|---------|---------|
| <b>Frequency group</b> | Spectral bandwidth              | 6.07*   | 0.017   |
|                        | Spectral centroid               | 11.76** | 0.0011  |
|                        | Spectral roll-off               | 4.79*   | 0.033   |
|                        | Spectral Kurtosis               | 6.23*   | 0.015   |
|                        | Spectral Skewness               | 8.44**  | 0.0052  |
| <b>Intensity group</b> | Temporal centroid               | 1.41    | 0.24    |
|                        | Maximum amplitude of the signal | 2.15    | 0.15    |



|                    |                                            |       |       |
|--------------------|--------------------------------------------|-------|-------|
|                    | Mean amplitude of the signal               | 1.35  | 0.25  |
|                    | Median amplitude of the signal             | 0.38  | 0.54  |
|                    | Standard deviation of the signal amplitude | 0.16  | 0.70  |
|                    | Variance amplitude of the signal           | 0.27  | 0.61  |
|                    | Peak-to-peak distance                      | 4.29* | 0.043 |
| <b>Mixed group</b> | Area under the curve of the signal         | 0.83  | 0.37  |
|                    | Maximum power of the signal                | 3.86  | 0.054 |
|                    | Spectral entropy                           | 0.66  | 0.42  |

306 Correlation is significant at the 0.05 level \*;  
307 Correlation is significant at the 0.01 level \*\*;  
308

309 As for the intensity-related features, the predictors found in the final model included  
310 temporal centroid, maximum, mean, median, standard deviation, variance, and kurtosis of the  
311 signal. The final ROC-AUC of the model prediction for the intensity group was 0.63 (IC 95%: 0.51-  
312 0.75).

313 Lastly, for the features related to the mixed group, the ones that remained in the model were  
314 the area under the curve of the signal, maximum power, spectral entropy, and gender. The final  
315 ROC-AUC of the model was 0.51 (IC 95%: 0.39-0.63).

316

## 317 **4.0 Discussion**

318 Our study aimed to comprehensive investigate the potential of cough sound features,  
319 extracted from both the time and frequency domains, as discriminators for clinical diagnosis of  
320 ALS, and predictors of bulbar and respiratory impairments, at the convenience of using a simple  
321 smartphone. Based on our hypothesis, significant differences were observed in the frequency  
322 group of features between ALS patients and healthy controls, after adjustment for age and gender.  
323 This was also the group of features that demonstrated higher correlations with bulbar  
324 impairments. Conversely, the intensity and mixed groups of features were found to be highly  
325 correlated with the functional status of the disease and were the most significant in detecting  
326 respiratory impairments (**Table 8**).

327

328

329

330 **Table 8.** Summary of all correlations undertaken in this study. The symbol ‘*check*’ denotes statistical  
 331 significance,  $\alpha=0.05$  was considered.

332

|                        |                             | Control | Alsfrs-R | Bulbar | Respiratory | FVC% | MIP% | MEP% | CPF |
|------------------------|-----------------------------|---------|----------|--------|-------------|------|------|------|-----|
| <b>Frequency group</b> | Maximum frequency           | ✓       | -        | ✓      | -           | -    | -    | -    | -   |
|                        | ZCR                         | ✓       | -        | -      | ✓           | -    | -    | -    | -   |
|                        | Spectral centroid           | -       | ✓        | ✓      | -           | -    | -    | -    | -   |
|                        | Sp. bandwidth               | ✓       | ✓        | ✓      | -           | -    | -    | -    | -   |
|                        | Sp. dispersion              | ✓       | -        | -      | -           | -    | -    | -    | -   |
|                        | Sp. Positive turning points | ✓       | -        | -      | -           | ✓    | -    | ✓    | -   |
| <b>Intensity group</b> | Maximum amplitude           | -       | ✓        | -      | ✓           | -    | -    | -    | -   |
|                        | Peak distance               | -       | ✓        | -      | ✓           | -    | -    | -    | -   |
|                        | Temporal centroid           | ✓       | -        | -      | -           | ✓    | -    | -    | -   |
| <b>Mixed group</b>     | AUC                         | -       | ✓        | -      | -           | ✓    | -    | -    | -   |
|                        | Maximum power               | -       | ✓        | -      | ✓           | -    | -    | -    | -   |
|                        | Sp. entropy                 | ✓       | -        | ✓      | ✓           | -    | -    | -    | -   |

333

334 Firstly, changes in sound frequencies during any type of vocalization are primarily  
 335 attributed to intrinsic modifications of the vocal cords. These variations in sound tone are  
 336 intricately linked to the vocal cords’ dimension, tension, and/or thickness (37). In the present  
 337 work, we noticed that the disease-related ALS cough is hoarser when compared to the controls –  
 338 i.e., patients’ cough depicts lower frequencies (more specifically, lower zero-crossing rates and  
 339 spectral positive turning points). These results suggest that the bulbar region of the glottis in ALS  
 340 patients potentially exhibits increased tension and reduced flexibility, as higher levels of tension  
 341 tend to produce lower frequency sounds (38–40).

342 Another finding, closely related to the previous, was that the cough produced by ALS  
343 patients displays greater sound entrainment, greater noise, and reduced sound occlusion when  
344 compared to controls. Occlusive sounds result from the obstruction or blockage of airflow in the  
345 vocal tract, and they are representative of functional cough sounds. In ALS, the adductor muscles  
346 of the arytenoid cartilages become dysfunctional (41), the glottis is not rapidly coordinated and  
347 fails to close effectively, leading to an abnormal compressive cough phase. Consequently, the  
348 typical peak in cough sound amplitude is not succeeded by a period of silence, but it is rather  
349 followed by an entrainment of the expiratory airflow. This was broadly represented by higher  
350 spectral dispersion and bandwidths. In fact, the cough sound properties of ALS patients resemble  
351 the characteristics of a sustainable vowel sound – a monophonic sound characterized by a  
352 continuous flow of air through the vocal cords. Moreover, as an alternative, the representation of  
353 the cough sound (presented in **Fig 3**) can also be explained by the varying properties of the  
354 medium through which the sound wave travels, such as different pressures and tensions, resulting  
355 in differing wave speeds and wave spread.

356 As a whole, the above-mentioned observations are in line with the evidence reported in  
357 cough airflow studies and cough waveforms visual analysis in patients with motor neuron  
358 diseases (42,43). Chaudri et al. (43) characterized the absence of distinct “peak expiratory spikes”  
359 and associated this with reduced cough strength and increased mortality. Recently, Plowman et  
360 al. (44) demonstrated that ALS patients showed lower peak expiratory flow rates and a longer  
361 time to generate maximum expiratory flow during a voluntary cough. They observed that this less  
362 efficient expulsive cough (as indexed by a lower cough volume acceleration) is predictive of poor  
363 airway safety during swallowing. Moreover, Korpáš et al. (45) have reported that, in laryngeal  
364 inflammation, the cough record consists of a large and long mono sound, where both sound  
365 intensity and duration may be increased. Thus, the cough sound in ALS may be associated with a  
366 secondary inflammation as well. All the aforementioned attributes collectively rendered this set  
367 of features superior in discriminating between cough sounds of patients and controls, resulting in  
368 a final model ROC-AUC of 0.85 (IC 95%: 0.79-0.91).

369           Emphasizing these primary distinctions in cough sounds between patients and controls, it  
370 is noteworthy that the observed differences between the two groups also manifested when  
371 comparing patients with and without bulbar symptoms. In this particular analysis, even though  
372 the machine-learning classifier did not exhibit exceptional robustness (with comparable results  
373 among frequency, intensity, and mixed feature groups), the most impactful features in  
374 distinguishing the two groups were maximum frequency, spectral bandwidth, and spectral  
375 centroid. Notably, these features are easily perceptible to the human ear, as healthy cough sounds  
376 typically display a clear quality, even when accounting for variations in age and gender. This  
377 enables clinicians to develop early suspicions regarding disease progression.

378           Furthermore, the intensity and mixed groups of features did not exhibit many significant  
379 differences between patients and healthy subjects. It is established that intense or louder sounds  
380 are related to higher air volumes in the lungs and consequently higher subglottic pressures.  
381 Despite 25 out of the 60 patients presenting respiratory dysfunction, as defined by scores less  
382 than 12 in the three respiratory-related questions of the ALSFRS- R (although many patients only  
383 presented with one less point) and a moderate to low FVC in the population, we speculate that  
384 these characteristics were insufficient to detect changes in intensity features, such as signal  
385 amplitude or peak distance, when compared to the cough sound of controls. Additionally, bulbar  
386 impairments such as a narrowed glottis are more likely to become clinically symptomatic when  
387 respiratory muscles are still strong enough to generate negative airway pressure(46).  
388 Nonetheless, patients exhibited higher spectral sound entropies and temporal centroids, meaning  
389 that the cough sounds are more variable and difficult to predict, and the average energy of the  
390 sound, occurs later in time (also related to wave spread and power). For these reasons, the sets of  
391 intensity and mixed features exhibited the lowest level of ROC-AUC, with the latter outperforming  
392 the former (ROC-AUC of 0.62, 95% CI: 0.55-0.69 and 0.70, 95% CI: 0.64-0.76, respectively),  
393 primarily due to the presence of features associated with sound frequency.

394 To verify the relationships between cough sound features and the respiratory system, the  
395 same approach was utilized, first to assess correlations with variables from respiratory function  
396 tests, and second to evaluate differences in patients with and without respiratory dysfunctions.

397 In ALS patients, coughing is impaired during both the inspiratory and expiratory phases,  
398 with lower volumes of inspired air during a prolonged inspiratory phase and a longer time period  
399 to generate a lower peak expiratory airflow during the expulsive phase (as reported by (41)).  
400 Additionally, studies have demonstrated that the volume of air achieved at the initiation of the  
401 cough has the greatest influence on the volume expelled during cough (47). In sound analysis,  
402 loudness and intense sounds are related to volume. This relationship further reinforces the  
403 significance of the intensity-based cough sound features as the most reliable indicators of  
404 respiratory impairment in patients. Furthermore, the cough sound pattern exhibited by ALS  
405 patients is consistent with that observed in patients with restrictive respiratory disease,  
406 characterized by reduced lung elasticity or limitations in chest wall expansion (16). In these  
407 patients, there is a gradual reduction in the intensity of cough attempts over time, leading to a  
408 negative slope of the signal amplitude (**Fig 4**). This is in contrast to obstructive respiratory  
409 diseases, where such a phenomenon is not observed. In the machine learning analysis, the model  
410 that demonstrated the highest ROC-AUC (although also not particularly robust overall), in  
411 distinguishing between patients with and without respiratory symptoms was the one trained with  
412 intensity-related features (0.67; IC 95%: 0.56-0.78). However, and despite these findings, the  
413 exact role of different respiratory muscles and their association with these cough sound features  
414 remains unclear. To understand this relation, we performed linear regressions between the cough  
415 sound features and FVC% values. FVC is highly associated with CPF measurements in ALS patients  
416 (Matsuda et al. 2019). Sharan et al. (12), demonstrated the potential for cough sound analysis to  
417 predict spirometry results in patients with different respiratory diseases. In this work, the  
418 intensity and mixed group of features, specifically the temporal centroid and absolute energy,  
419 exhibited stronger correlations with FVC%. These findings provide support for the association  
420 between sound energy, intensity, and lung function. Notably, the correlations between FVC% and

421 energy features are negative. This finding may indicate that patients with respiratory  
422 dysfunctions often experienced increased efforts to move air in and out of the lungs and even that,  
423 as it becomes difficult to fully exhale air, leading to air trapping, the trapped air during the  
424 subsequent cough bouts has contributed to higher sound energies. It was also anticipated that  
425 stronger correlations would be observed between cough sound features and MEP%, in  
426 comparison to MIP%, given that pulmonary exhalation is the primary source of energy for sound  
427 production.

428 MEP represents the highest achievable pressure during forceful expiration against a  
429 closed airway and indicates the strength of the abdominal muscles and other expiratory muscles.  
430 Conversely, MIP assesses the strength of inspiratory muscles, primarily the diaphragm, and  
431 enables the evaluation of ventilatory insufficiency. Although only the spectral positive turning  
432 points showed a significant correlation with MEP%, sound energy exhibited the potential to serve  
433 as a valuable distinguishing feature as well. Moreover, no significant associations were observed  
434 between cough sound features and CPF. This test involves coughing forcefully into a face mask  
435 connected to a small peak flow meter, and it measures the expelled airflow. We speculate that its  
436 precision may be limited by acoustic variations, particularly considering that cough sounds were  
437 captured laterally from the mouth, rather than directly by the smartphone microphone, to  
438 mitigate interference from wind noise. This represents a distinct analytic approach.

439 Some limitations of this study must be acknowledged. Specifically, voluntary coughs  
440 bypass the sensory system and previous research has demonstrated that maximum voluntary  
441 cough function tends to overestimate reflexive cough function among healthy volunteers (47,48).  
442 Moreover, the current study includes patients with mild-moderate disease severity. As a result,  
443 the generalization of these findings to airway defense in the event of aspiration as well as to  
444 individuals in a more advanced disease state may be limited. Further, given the clinical  
445 heterogeneity of ALS, it would be beneficial to document upper versus lower motor neuron  
446 involvement, and slow versus fast progress to develop more homogenous groups for comparison.  
447 It is also possible that more appropriate features (as well as other machine learning models) may

448 be extracted from the data, even when features that do not contribute to the model prediction  
449 ROC-AUC were eliminated. Performing a longitudinal cough sound analysis, recording cough  
450 sounds in a lying position, making clinical correlations with phrenic nerve conduction measures  
451 and muscle strength of cervical muscles, and adjusting the results for other motor neuron diseases  
452 are future perspectives that could help elucidate the results of this paper.

## 453 **5.0 Conclusion**

454 The present study demonstrates that analyzing cough sounds can serve as a valuable  
455 technique for evaluating and monitoring ALS patients, particularly those with respiratory and  
456 bulbar impairments. However, it is important to note that cough sound analysis should not be the  
457 only indicator utilized to evaluate respiratory and bulbar health, as ALS is a multifaceted and  
458 intricate disease. Rather, it can be used as an adjunct measure, supplementing commonly used  
459 ways of disease progression. It is also noteworthy that the method used in this study was a  
460 convenient smartphone-based approach, which facilitates data collection in home-based settings  
461 without requiring specialized careers or equipment.

462

463

464

465

466

467

468

## 469 **Financial Disclosure Statement**

470 This study was part of a broader ALS project (HomeSenseALS - PTDC/MEC-NEU/6855/2020),  
471 supported by the Foundation for Science and Technology.

472

## 473 **Competing interest**

1 No potential conflict of interest was reported by the author(s).

2  
3  
4  
5  
6

## 7 **References**

8

- 9 1. Hardiman O, Al-Chalabi A, Chio A, Corr EM, Logroscino G, Robberecht W, et al.  
10 Amyotrophic lateral sclerosis. Vol. 3, Nature Reviews Disease Primers. Nature Publishing  
11 Group; 2017.
- 12 2. De Carvalho M, Swash M, Pinto S. Diaphragmatic neurophysiology and respiratory markers  
13 in ALS. Vol. 10, Frontiers in Neurology. Frontiers Media S.A.; 2019.
- 14 3. Brown RH, Al-Chalabi A. Amyotrophic Lateral Sclerosis. New England Journal of Medicine.  
15 2017 Jul 13;377(2):162–72.
- 16 4. Gordon PH, Cheng B, Katz IB, Pinto M, Hays AP, Mitsumoto H, et al. The natural history of  
17 primary lateral sclerosis. Neurology. 2006;66(5):647–53.
- 18 5. Wales S, C Kiernan DSc AM, Cheah M, Biostat BC, Burrell MBBS J, Zoing BNurs MC,  
19 Kiernan MC, et al. Seminar Amyotrophic lateral sclerosis. Lancet [Internet]. 2011;377:942–  
20 55. Available from: [www.thelancet.com](http://www.thelancet.com)
- 21 6. Swinnen B, Robberecht W. The phenotypic variability of amyotrophic lateral sclerosis. Vol.  
22 10, Nature Reviews Neurology. Nature Publishing Group; 2014. p. 661–70.
- 23 7. Gromicho M, Figueiral M, Uysal H, Grosskreutz J, Kuzma-Kozakiewicz M, Pinto S, et al.  
24 Spreading in ALS: The relative impact of upper and lower motor neuron involvement. Ann  
25 Clin Transl Neurol. 2020 Jul 1;7(7):1181–92.
- 26 8. Darrell Hulisz. Am J Manag Care. 2018. Amyotrophic Lateral Sclerosis: Disease State  
27 Overview.
- 28 9. Pinto S, Gromicho M, Oliveira Santos MO, Swash M, De Carvalho M. Respiratory onset in  
29 amyotrophic lateral sclerosis: clinical features and spreading pattern. Amyotroph Lateral Scler  
30 Frontotemporal Degener. 2023 Jan 2;24(1–2):40–4.
- 31 10. Kaufmann P, Levy G, Thompson J, DeBene M, Battista V, Gordon P, et al. The ALSFRS  
32 predicts survival time in an ALS clinic population. 2005.
- 33 11. Pinto S, de Carvalho M. Comparison of slow and forced vital capacities on ability to predict  
34 survival in ALS. Amyotroph Lateral Scler Frontotemporal Degener. 2017 Oct 2;18(7–8):528–  
35 33.
- 36 12. Sharan R V., Abeyratne UR, Swarnkar VR, Claxton S, Hukins C, Porter P. Predicting  
37 spirometry readings using cough sound features and regression. Physiol Meas. 2018 Sep  
38 5;39(9).
- 39 13. Pattee GL, Plowman EK, (Focht) Garand KL, Costello J, Brooks BR, Berry JD, et al.  
40 Provisional best practices guidelines for the evaluation of bulbar dysfunction in amyotrophic  
41 lateral sclerosis. Muscle Nerve. 2019 May 1;59(5):531–6.
- 42 14. Chung Y, Jin J, Jo HI, Lee H, Kim SH, Chung SJ, et al. Diagnosis of pneumonia by cough  
43 sounds analyzed with statistical features and ai. Sensors. 2021 Nov 1;21(21).
- 44 15. Kosasih K, Abeyratne UR, Swarnkar V, Triasih R. Wavelet Augmented Cough Analysis for  
45 Rapid Childhood Pneumonia Diagnosis. IEEE Trans Biomed Eng. 2015 Apr 1;62(4):1185–94.



- 1 16. Rudraraju G, Palreddy SD, Mamidgi B, Sripada NR, Sai YP, Vodnala NK, et al. Cough sound  
2 analysis and objective correlation with spirometry and clinical diagnosis. *Inform Med*  
3 *Unlocked*. 2020 Jan 1;19.
- 4 17. Sharan R V., Abeyratne UR, Swarnkar VR, Porter P. Automatic croup diagnosis using cough  
5 sound recognition. *IEEE Trans Biomed Eng*. 2019 Feb 1;66(2):485–95.
- 6 18. Toop LJ, Thorpe CW, Frightt R. Cough Sound Analysis: A New Tool for the Diagnosis of  
7 Asthma? [Internet]. Vol. 6, *Family Practice* ©Oxford University Press. 1989. Available from:  
8 <http://fampra.oxfordjournals.org/>
- 9 19. Lee KK, Davenport PW, Smith JA, Irwin RS, McGarvey L, Mazzone SB, et al. Global  
10 Physiology and Pathophysiology of Cough: Part 1: Cough Phenomenology – CHEST  
11 Guideline and Expert Panel Report. Vol. 159, *Chest*. Elsevier Inc.; 2021. p. 282–93.
- 12 20. McGarvey L, Rubin BK, Ebihara S, Hegland K, Rivet A, Irwin RS, et al. Global Physiology  
13 and Pathophysiology of Cough: Part 2. Demographic and Clinical Considerations: CHEST  
14 Expert Panel Report. *Chest*. 2021 Oct 1;160(4):1413–23.
- 15 21. Chatwin M, Simonds AK. Long-term mechanical insufflation-exsufflation cough assistance in  
16 neuromuscular disease: Patterns of use and lessons for application. *Respir Care*. 2020 Feb  
17 1;65(2):135–43.
- 18 22. Plowman EK, Tabor-Gray L, Rosado KM, Vasilopoulos T, Robison R, Chapin JL, et al. Impact  
19 of expiratory strength training in amyotrophic lateral sclerosis: Results of a randomized, sham-  
20 controlled trial. *Muscle Nerve*. 2019 Jan 1;59(1):40–6.
- 21 23. Berry JD, Paganoni S, Carlson K, Burke K, Weber H, Staples P, et al. Design and results of a  
22 smartphone-based digital phenotyping study to quantify ALS progression. *Ann Clin Transl*  
23 *Neurol*. 2019 May 1;6(5):873–81.
- 24 24. van Eijk RPA, Bakers JNE, Bunte TM, de Fockert AJ, Eijkemans MJC, van den Berg LH.  
25 Accelerometry for remote monitoring of physical activity in amyotrophic lateral sclerosis: a  
26 longitudinal cohort study. *J Neurol*. 2019 Oct 1;266(10):2387–95.
- 27 25. Garcia-Gancedo L, Kelly ML, Lavrov A, Parr J, Hart R, Marsden R, et al. Objectively  
28 monitoring amyotrophic lateral sclerosis patient symptoms during clinical trials with sensors:  
29 Observational study. *JMIR Mhealth Uhealth*. 2019;7(12).
- 30 26. Haulman A, Geronimo A, Chahwala A, Simmons Z. The Use of Telehealth to Enhance Care  
31 in ALS and other Neuromuscular Disorders. Vol. 61, *Muscle and Nerve*. John Wiley and Sons  
32 Inc.; 2020. p. 682–91.
- 33 27. Stegmann GM, Hahn S, Duncan CJ, Rutkove SB, Liss J, Shefner JM, et al. Estimation of forced  
34 vital capacity using speech acoustics in patients with ALS. *Amyotroph Lateral Scler*  
35 *Frontotemporal Degener*. 2021;22(S1):14–21.
- 36 28. Vashkevich M, Rushkevich Y. Classification of ALS patients based on acoustic analysis of  
37 sustained vowel phonations. *Biomed Signal Process Control*. 2021 Mar 1;65.
- 38 29. Cebola R, Folgado D, Carreiro A, Gamboa H. Speech-Based Supervised Learning Towards  
39 the Diagnosis of Amyotrophic Lateral Sclerosis. In *INSTICC*; 2023. p. 74–85.
- 40 30. Shefner JM, Al-Chalabi A, Baker MR, Cui LY, de Carvalho M, Eisen A, et al. A proposal for  
41 new diagnostic criteria for ALS. Vol. 131, *Clinical Neurophysiology*. Elsevier Ireland Ltd;  
42 2020. p. 1975–8.
- 43 31. de Carvalho M, Reinhard Dengler, Andrew Eisen, John D England, Ryuji Kaji, Jun Kimura,  
44 et al. Electrodiagnostic criteria for diagnosis of ALS. *Review Clin Neurophysiol*. 2008;
- 45 32. Cedarbaum JM, Stambler N, Malta E, Fuller C, Hilt D. The ALSFRS-R: a revised ALS  
46 functional rating scale that incorporates assessments of respiratory function [Internet]. Vol.  
47 169, *Journal of the Neurological Sciences*. 1999. Available from: [www.elsevier.com/locate/jns](http://www.elsevier.com/locate/jns)
- 48 33. McFee B, McVicar M, Faronbi D, Roman I, Gover M, Balke S, et al. *librosa/librosa*:  
49 0.10.0.post2. 2023 Mar 17 [cited 2023 Apr 24]; Available from:  
50 <https://zenodo.org/record/7746972>

- 1 34. Barandas M, Folgado D, Fernandes L, Santos S, Abreu M, Bota P, et al. TSFEL: Time Series  
2 Feature Extraction Library. *SoftwareX*. 2020 Jan 1;11.
- 3 35. Abaza AA, Day JB, Reynolds JS, Mahmoud AM, Goldsmith WT, McKinney WG, et al.  
4 Classification of voluntary cough sound and airflow patterns for detecting abnormal pulmonary  
5 function. *Cough*. 2009;5(1).
- 6 36. Nemati E, Rahman J, Blackstock E, Nathan V, Rahman M, Vatanparvar K, et al. Estimation  
7 of the Lung Function Using Acoustic Features of the Voluntary Cough\*. 2020 42nd Annual  
8 International Conference of the IEEE Engineering in Medicine & Biology Society (EMBC).  
9 2020.
- 10 37. Susan Stranding, Neil R Borley, Patricia Collins, Alan R Crossman, Michael A Gatzoulis,  
11 Jeremiah C Healy, et al. *Gray's: Atlas de anatomia* . 40th ed. Elsevier; 2010. 592 p.
- 12 38. Fukae J, Kubo SI, Hattori N, Komatsu K, Kato M, Aoki M, et al. Hoarseness due to bilateral  
13 vocal cord paralysis as an initial manifestation of familial amyotrophic lateral sclerosis.  
14 *Amyotrophic Lateral Sclerosis and Other Motor Neuron Disorders*. 2005 Jun;6(2):122–4.
- 15 39. Van Der Graaff MM, Grolman W, Westermann EJ, Boogaardt HC, Koelman H, Anneke ;, et  
16 al. Vocal Cord Dysfunction in Amyotrophic Lateral Sclerosis Four Cases and a Review of the  
17 Literature [Internet]. Vol. 66, *Arch Neurol*. 2009. Available from:  
18 <http://archneur.jamanetwork.com/>
- 19 40. Hillel A, Dray T, Miller R, Yorkston K, Konikow N, Strande E, et al. Presentation of ALS to  
20 the otolaryngologist/head and neck surgeon: getting to the neurologist. *Neurology* . 1999;
- 21 41. Tabor-Gray LC, Gallestagai A, Vasilopoulos T, Plowman EK. Characteristics of impaired  
22 voluntary cough function in individuals with amyotrophic lateral sclerosis. *Amyotroph Lateral*  
23 *Scler Frontotemporal Degener*. 2019 Jan 2;20(1–2):37–42.
- 24 42. Tabor-Gray L, Vasilopoulos T, Plowman EK. Concordant Validity of a Digital Peak Cough  
25 Flow Meter to Assess Voluntary Cough Strength in Individuals with ALS. *Dysphagia*. 2020  
26 Aug 1;35(4):568–73.
- 27 43. Chaudri MB, Liu C, Hubbard R, Jefferson D, Kinnear WJ. Relationship between supramaximal  
28 flow during cough and mortality in motor neurone disease. *European Respiratory Journal*.  
29 2002;19(3):434–8.
- 30 44. Plowman EK, Watts SA, Robison R, Tabor L, Dion C, Gaziano J, et al. Voluntary Cough  
31 Airflow Differentiates Safe Versus Unsafe Swallowing in Amyotrophic Lateral Sclerosis.  
32 *Dysphagia*. 2016 Jun 1;31(3):383–90.
- 33 45. Korpáš J, Sadloňová J, Vrabec M. Analysis of the Cough Sound: an Overview. Vol. 9,  
34 *Pulmonary Pharmacology*. 1996.
- 35 46. Hillel AD, Miller R. Bulbar amyotrophic lateral sclerosis: patterns of progression and  
36 management. *Head Neck*. 1989;
- 37 47. Tabor-Gray L, Vasilopoulos T, Plowman EK. Differences in voluntary and reflexive cough  
38 strength in individuals with amyotrophic lateral sclerosis and healthy adults. *Muscle Nerve*.  
39 2020 Nov 1;62(5):597–600.
- 40 48. Brandimore AE, Troche MS, Huber JE, Hegland KW. Respiratory kinematic and  
41 airflow differences between reflex and voluntary cough in healthy young adults. *Front*  
42 *Physiol*. 2015;6(OCT).

## 45 **Supporting information**

- 46
- 47 **S1 File. Dataset encompassing all the information used for comparing a cough sound**  
48 **associated with ALS and a cough sound from a healthy control.**
- 49

1           **S2 File. Dataset encompassing all the information used for comparing cough sound**  
2           **features and clinical variables from ALS patients.**

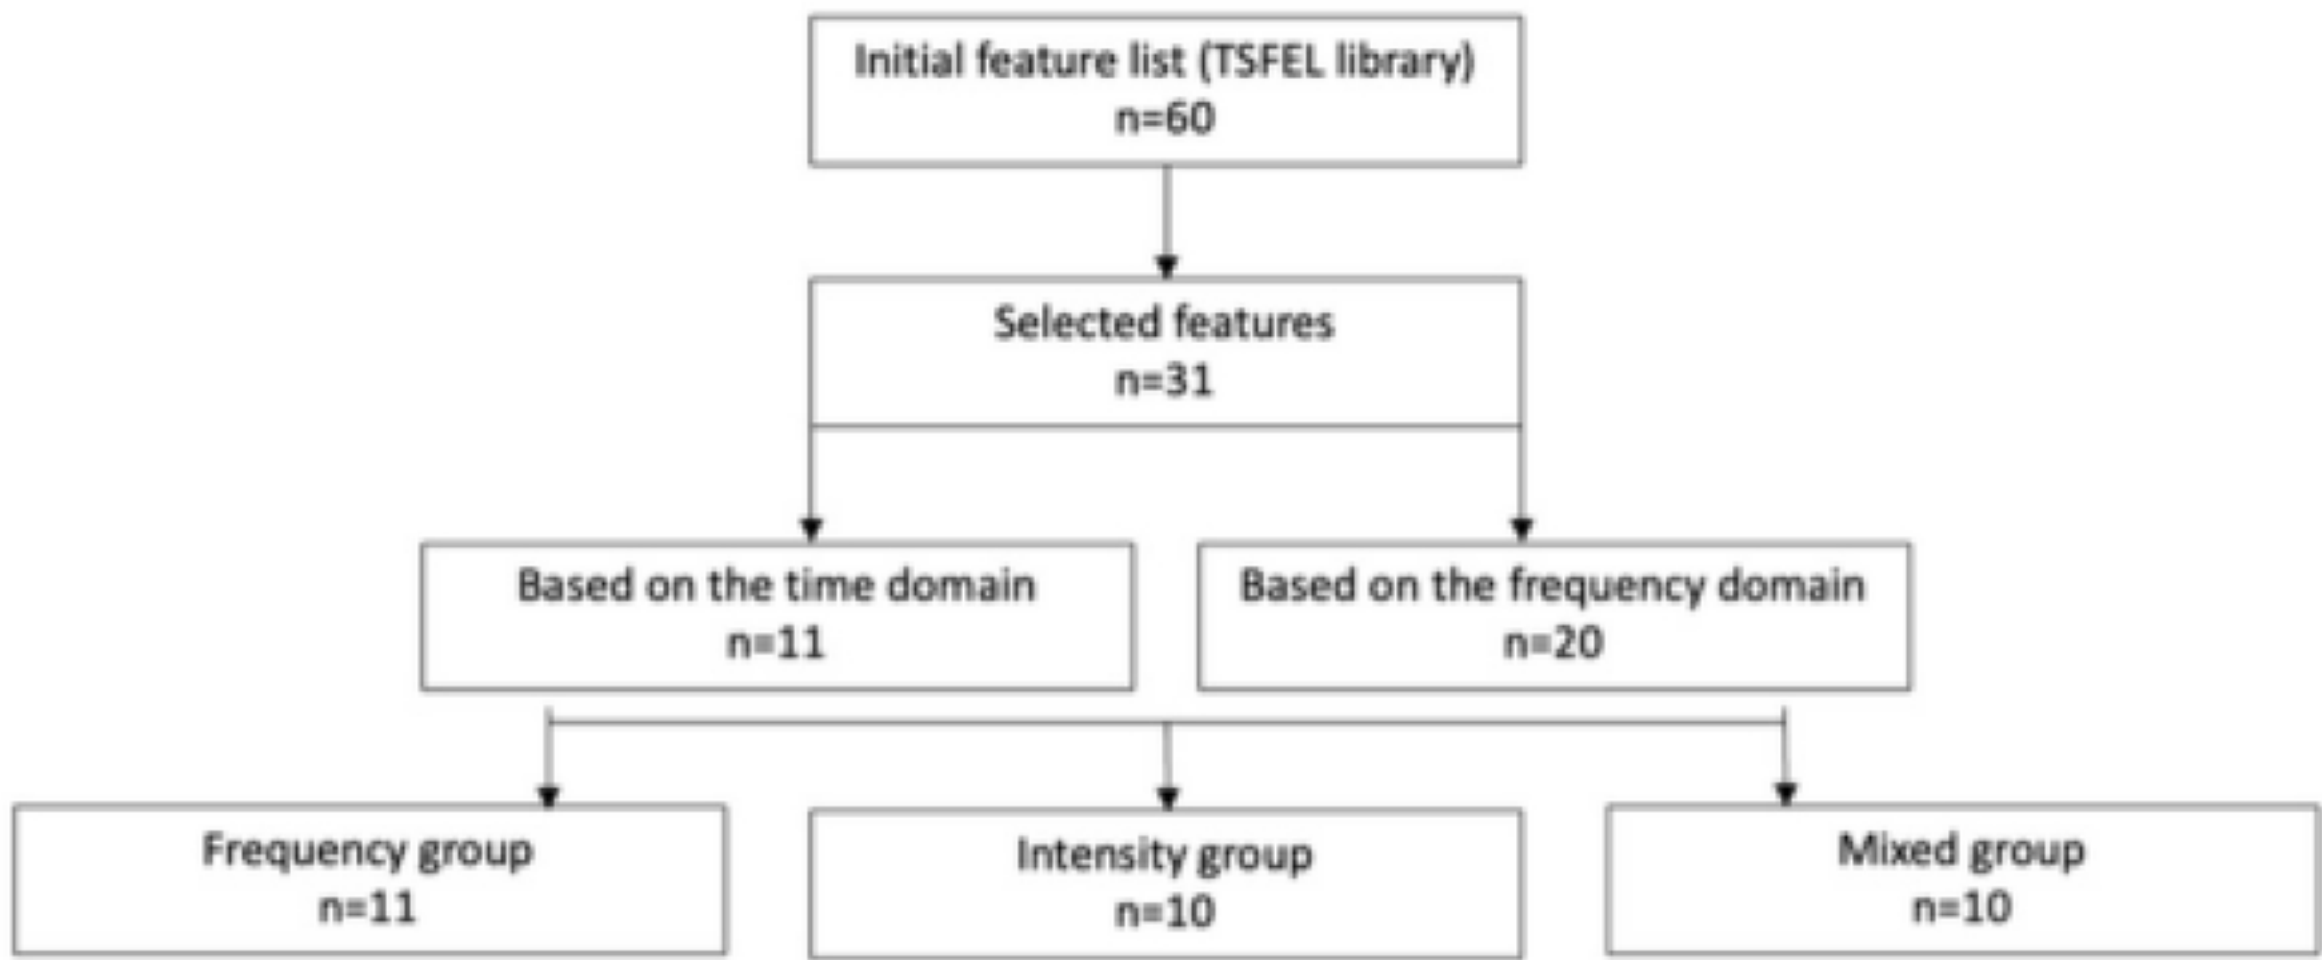

Figure 1

# ALS patients vs. Controls

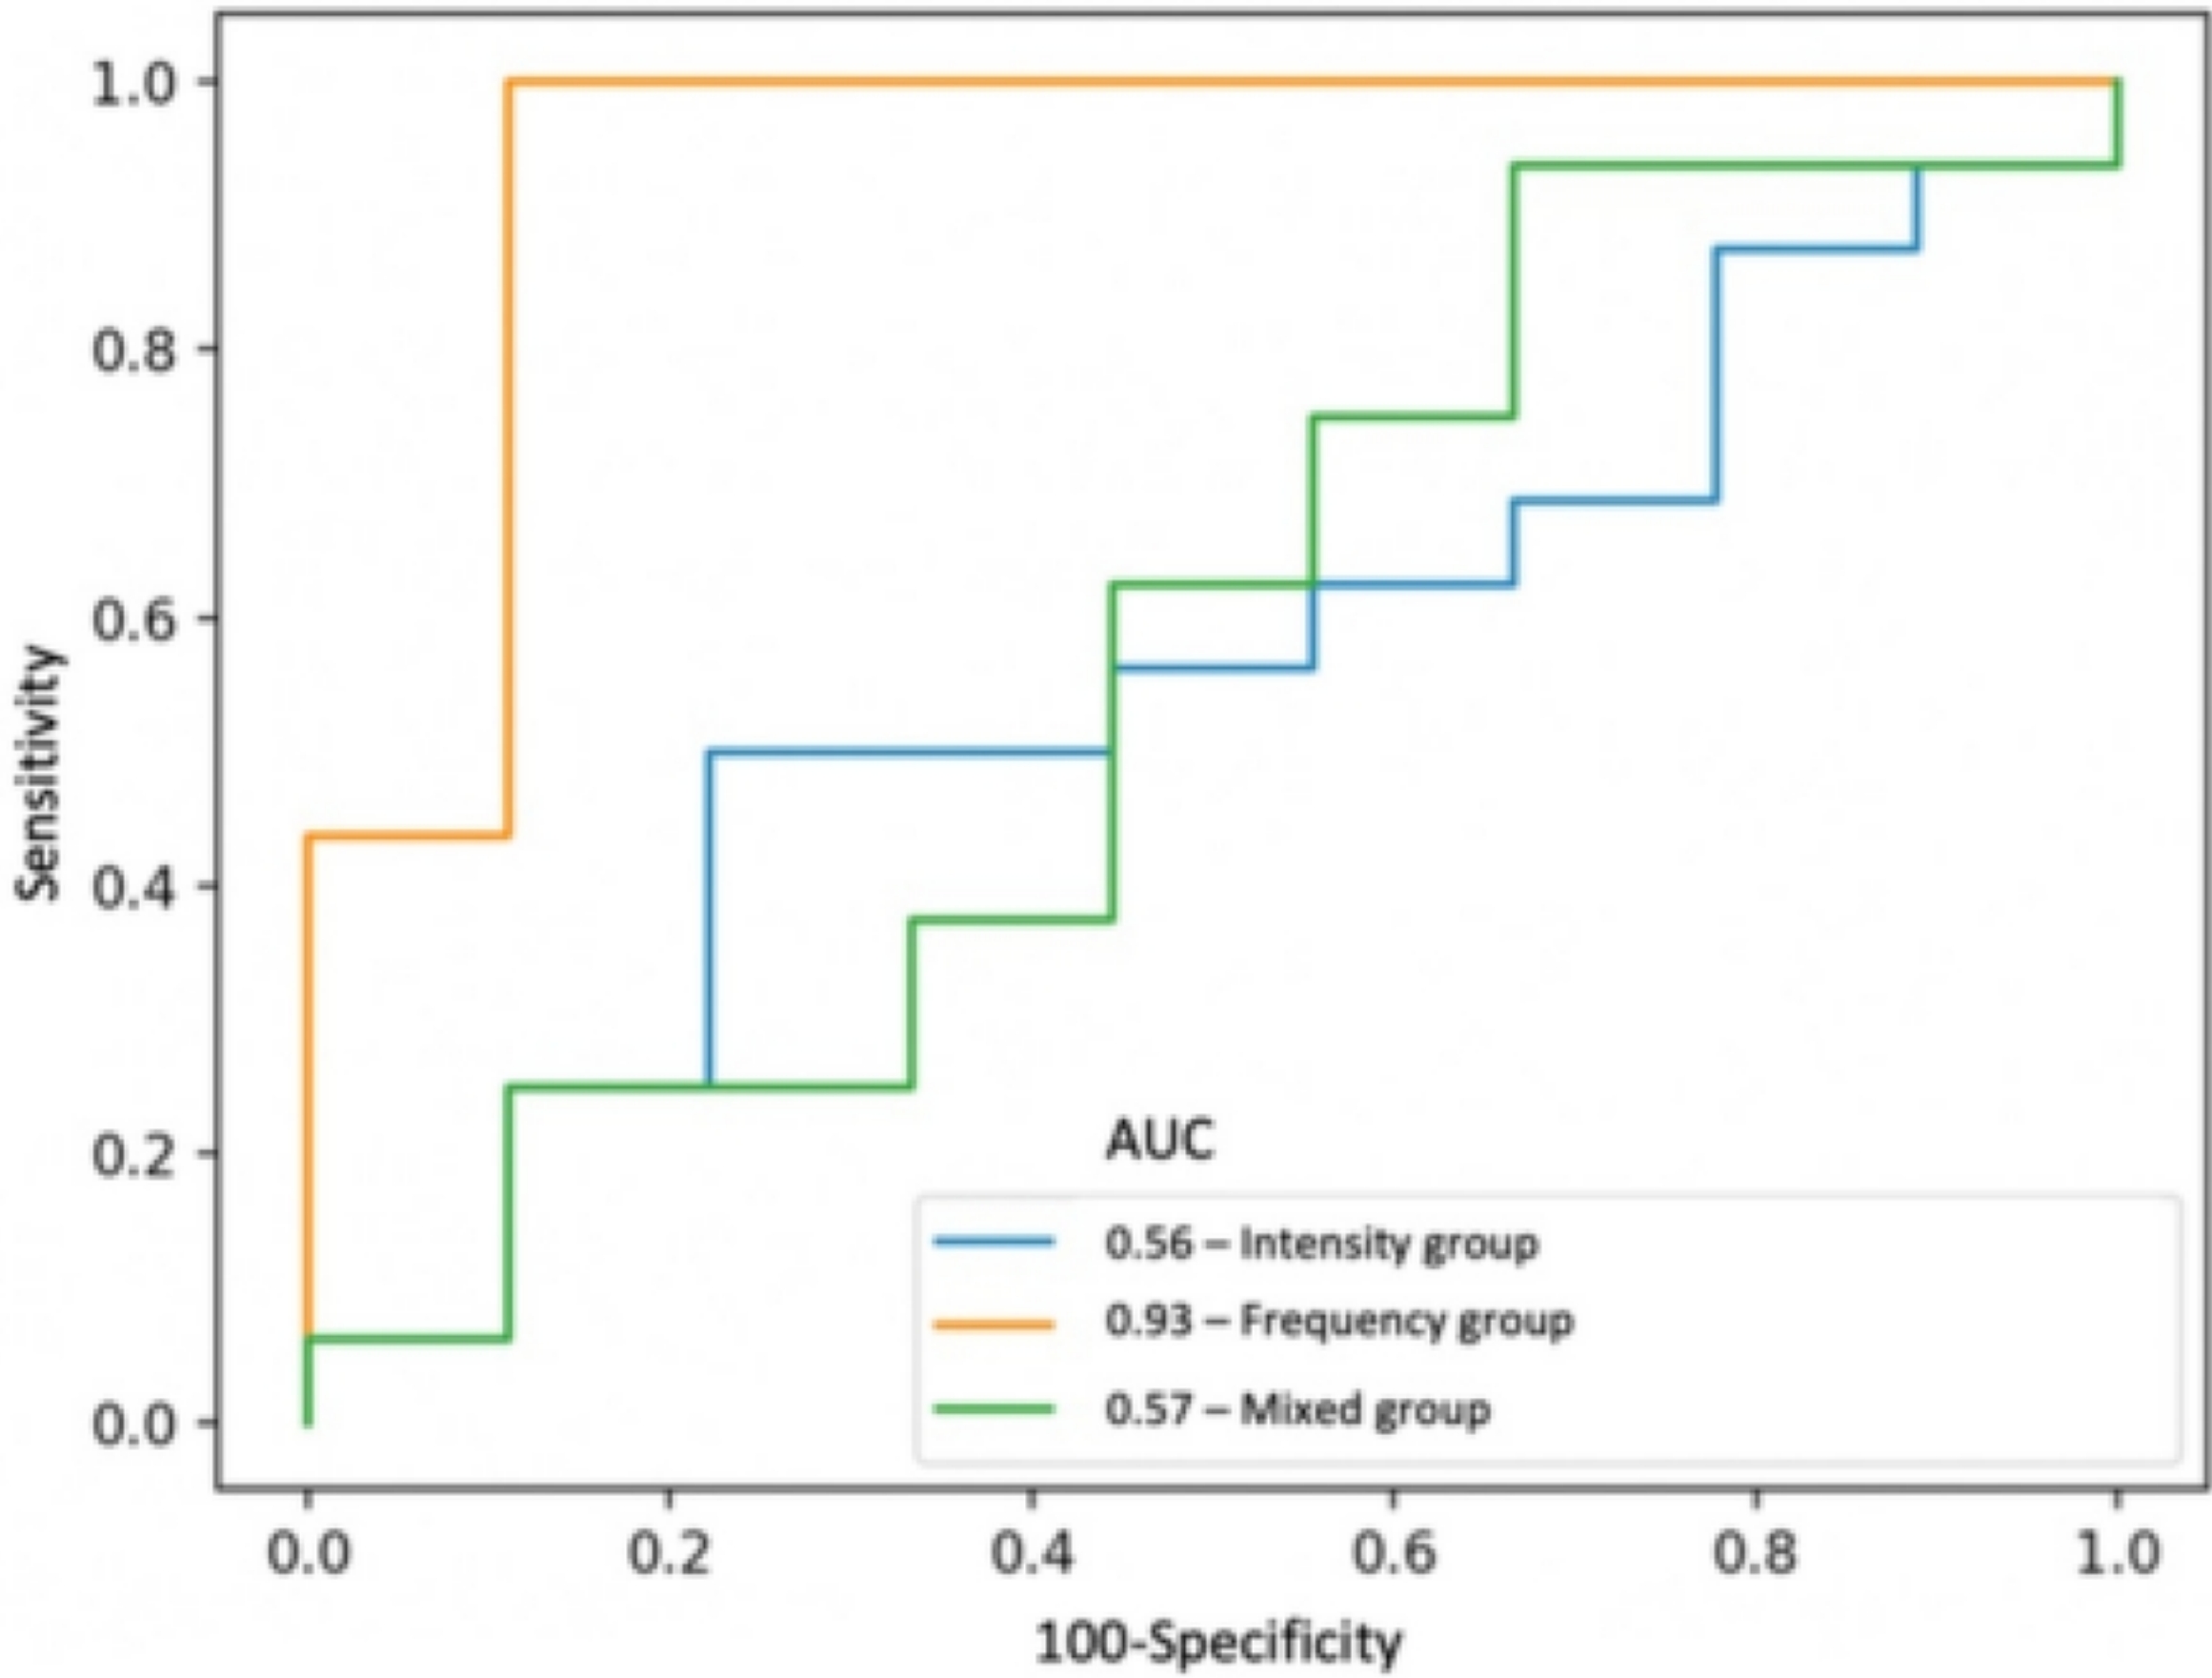

Figure 2

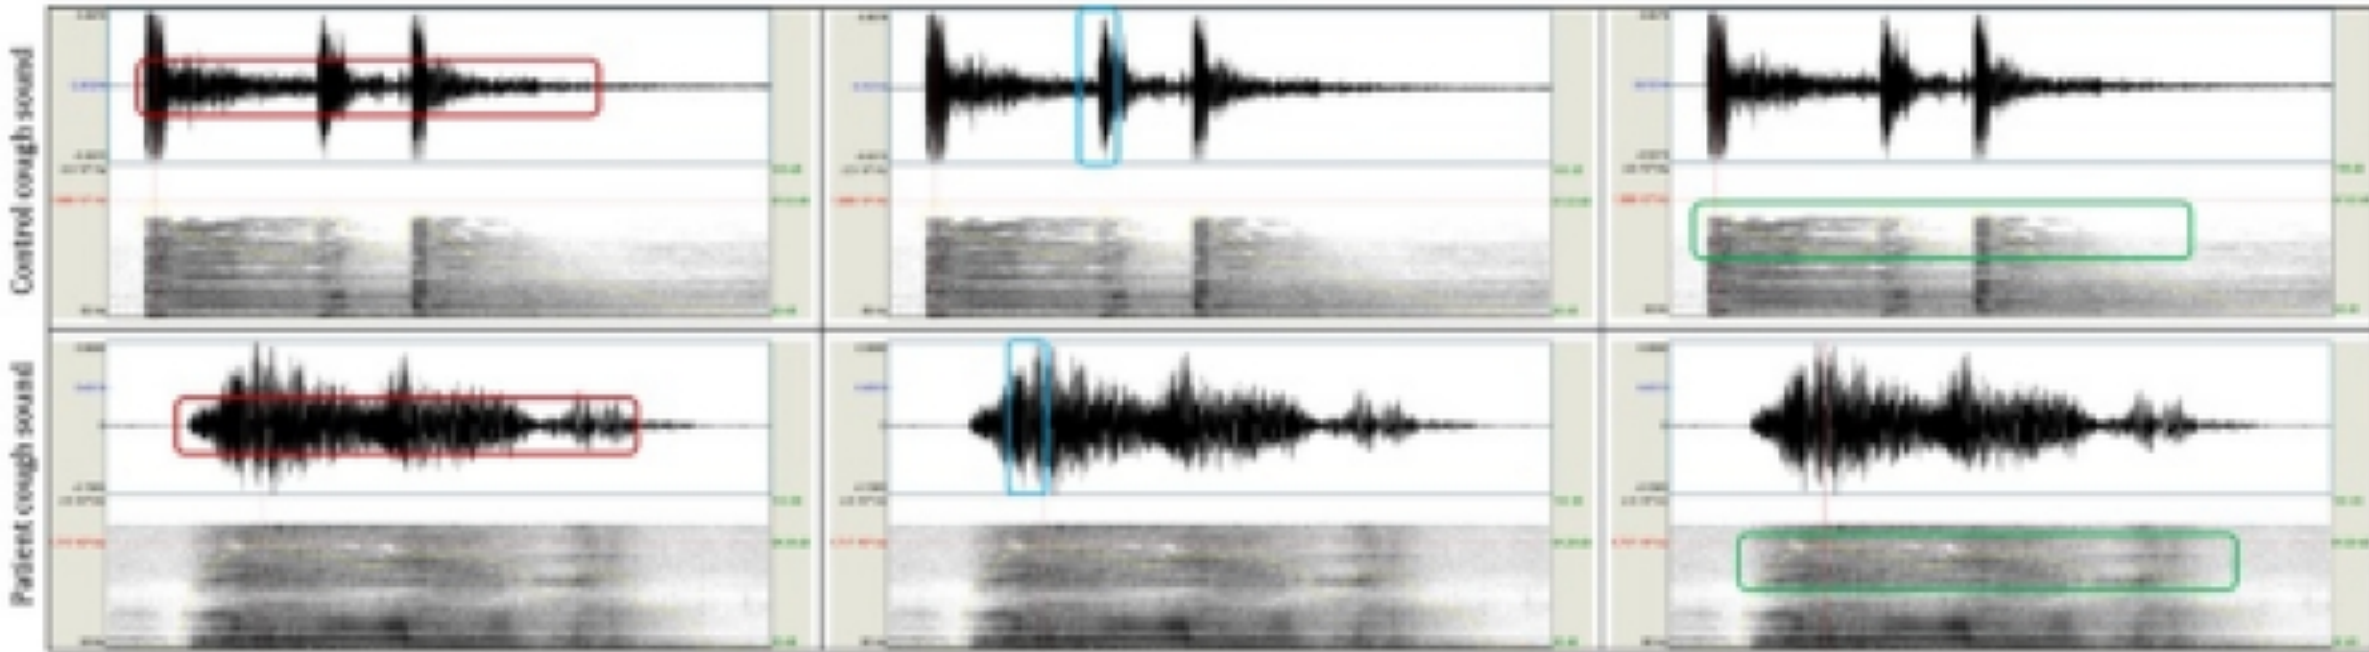

Figure 3

A) Patient in a better functional state

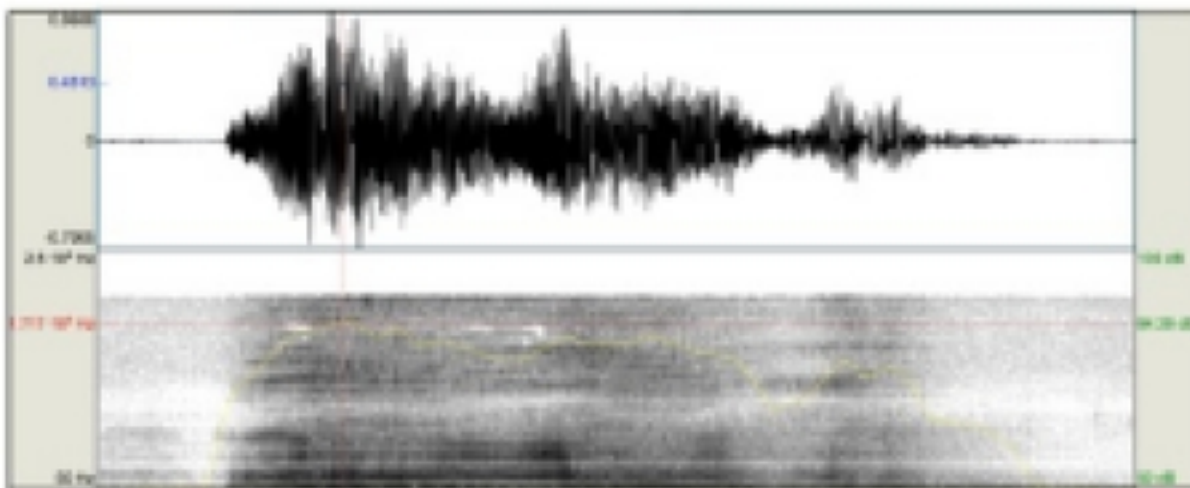

B) Patient in a worse functional state

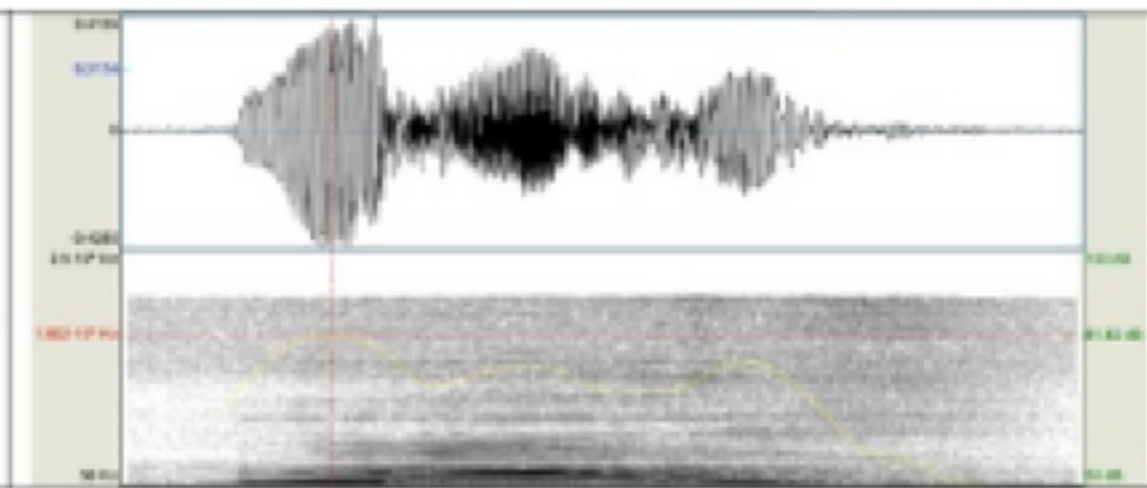

Figure 4
